# Supplementary material
Source: MDPI journal article supplement (https://www.mdpi.com/2073-4441/16/1/25)
Supplement: s1 [file s1]

## Supplementary Materials

**Table S1.** BET results of MIL-101(Fe)、MIL-101(Fe) - NH<sub>2</sub>、MIL-101(Fe) -NO<sub>2</sub>、MIL-101(Fe) -Br、CNT@MIL-101(Fe).

| Material                    | Pore volume (cm <sup>3</sup> /g) | S <sub>BET</sub> (m <sup>2</sup> /g) | Pore size (nm) |
|-----------------------------|----------------------------------|--------------------------------------|----------------|
| MIL-101(Fe)                 | 0.601                            | 1730.85                              | 1.171          |
| MIL-101(Fe)-NH <sub>2</sub> | 0.511                            | 1724.85                              | 1.177          |
| MIL-101(Fe)-NO <sub>2</sub> | 1.021                            | 1652.52                              | 1.171          |
| MIL-101(Fe)-Br              | 1.578                            | 2318.37                              | 1.155          |
| CNT@MIL-101(Fe)             | 1.127                            | 2443.35                              | 1.170          |

**Table S2.** Effect of the ratio of metal to organic ligand synthesis on the removal rate of Cr(VI).

| n(H <sub>2</sub> BDC): n(FeCl <sub>3</sub> ) | DMF dosage(mL) | removal rate (%) |
|----------------------------------------------|----------------|------------------|
| 2:1                                          | 10             | 35               |
| 1:1                                          |                | 44               |
| 1:2                                          |                | 50               |
| 1:3                                          |                | 30               |
| 1:4                                          |                | 22               |

**Table S3.** Effect of different DMF dosage on the removal rate of Cr(VI).

| n(H <sub>2</sub> BDC): n(FeCl <sub>3</sub> ) | DMF dosage (mL) | removal rate (%) |
|----------------------------------------------|-----------------|------------------|
| 1:2                                          | 10              | 50.5             |
|                                              | 20              | 61.4             |
|                                              | 30              | 71.1             |
|                                              | 40              | 72.0             |
|                                              | 50              | 72.2             |

**Table S4.** MIL-101- $\text{Na}_2\text{CO}_3$  thermodynamic model fitting parameters.

| T (°C) | K(mL/g) | $\Delta G(\text{kJ mol}^{-1})$ | $\Delta H(\text{kJ mol}^{-1})$ | $\Delta S(\text{kJ mol}^{-1})$ |
|--------|---------|--------------------------------|--------------------------------|--------------------------------|
| 10     | 4.33    | -3.448                         | 21.368                         | 83.3                           |
| 20     | 5.05    | -3.945                         |                                |                                |
| 30     | 6.33    | -4.649                         |                                |                                |
| 40     | 10.09   | -6.015                         |                                |                                |

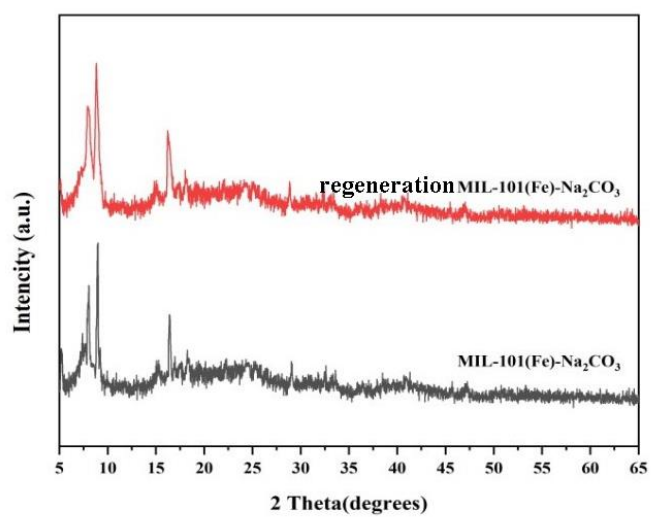

**Figure S1.** XRD pattern of MIL-101- $\text{Na}_2\text{CO}_3$ .
